# Supplementary material
Source: PubMed Central journal article supplement (PMC10767985)
Supplement: NIHMS1949096-supplement-1.pdf [file NIHMS1949096-supplement-1.pdf]

## Appendix 1: Study sites for the PROVE-AAA study

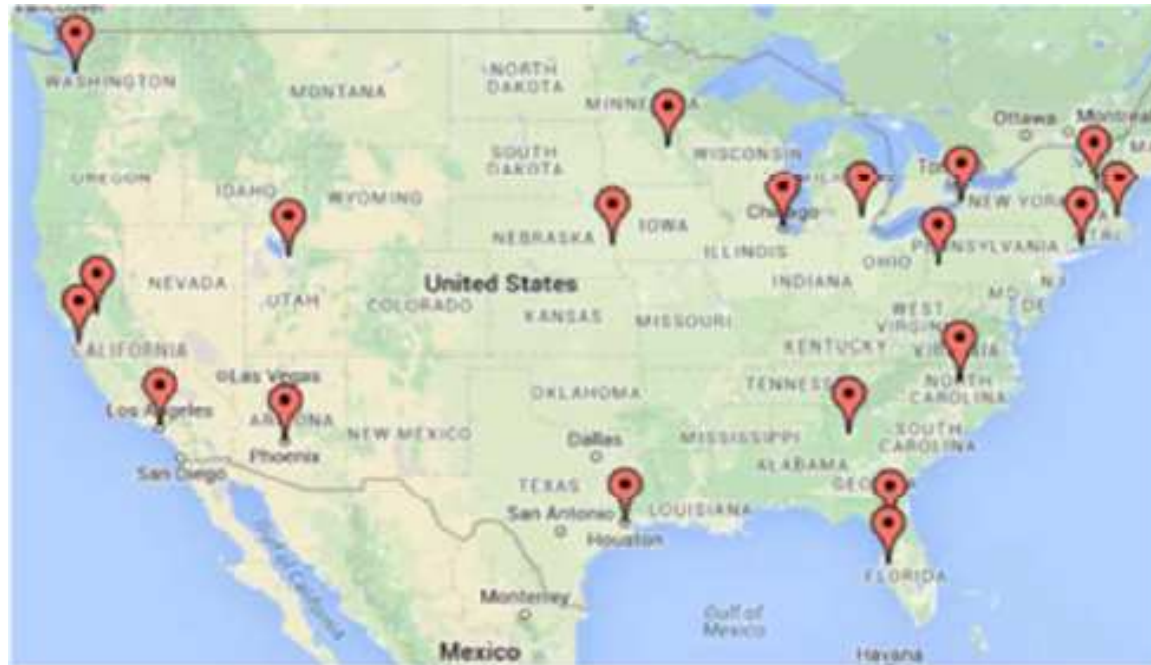

| Twenty national VA vascular surgery sites for the study. |                 |                 |               |                          |
|----------------------------------------------------------|-----------------|-----------------|---------------|--------------------------|
| Ann Arbor, MI                                            | Cleveland, OH   | Los Angeles, CA | Palo Alto, CA | Tampa, FL                |
| Buffalo, NY                                              | Decatur, GA     | Mather, CA      | Phoenix, AZ   | West Haven, CT           |
| Chicago, IL                                              | Gainesville, FL | Minneapolis, MN | San Diego, CA | West Roxbury, MA         |
| Pittsburgh, PA                                           | Houston, TX     | Omaha, NE       | Seattle, WA   | White River Junction, VT |

## Appendix 2:

### 1. Control Group Instruments

Survey Administration Guide

Preference Survey

Decision Process Score

Surgeon Survey

PSQ-18

### 2. Intervention Group Instruments

Survey Administration Guide

Pre-Survey, Decision Aid, Preference Survey

Decision Process Score

Surgeon Survey

PSQ-18

# Survey Administration Guide

## Control Sites

# Survey Administration Guide

## Control Group

1. Patient deemed eligible for both open repair and EVAR by Site Principal Investigator
2. Consent by Study Site Coordinator
3. Repair Preferences Survey (naive version), Surgeon Survey (Pre)
4. Physician Visit
5. Surgeon Survey (Post), Decision Process Score at end of visit.
6. PSQ-18 at 30 days post repair.

## Intervention Group

1. Patient deemed eligible for both open repair and EVAR by Site Principal Investigator
2. Consent by Study Site Coordinator
3. Pre-Survey, Decision Aid, Repair Preferences Survey (Decision Aid Version), Surgeon Survey (Pre)
4. Physician Visit
5. Surgeon Survey (Post), Decision Process Score at end of visit.
6. PSQ-18 at 30 days post repair.

# Survey of Veteran Preference for Method of Abdominal Aortic Aneurysm Repair

## **What is the survey about?**

This is a survey to explore patient views about abdominal aortic aneurysm (AAA) and the current treatment options as described in the detailed patient decision aid. Information from the survey will improve our understanding of what is important to patients who have this condition and could result in greater patient involvement in future treatment and care.

## **Why should I complete the survey?**

The views of all patients are important. This is your chance to help to shape future care of AAA patients. Taking part in this survey is voluntary.

## **Who is carrying out the survey?**

The survey is being carried out by a research team at the Veterans Administration Hospital in White River Junction, Vermont.

## **How to complete the survey**

Please answer the questions as fully as possible following the instructions given. The questionnaire is short and will take under 15 minutes to complete.

## **Questions or help?**

If you have any questions, please ask the nurse coordinator who administered the survey.

**Your answers are confidential.**

---

## A Your initial preference

We are interested to know your views of the two main surgical treatment options .

Please mark your answer clearly  
**INSIDE one box for each question**

Ex: check  **one** box only

**A1** \_\_\_\_\_  
Would you say that you:

- 1 D Had definitely considered the different options for surgical repair
- 2 D Had considered the different options for surgical repair to some extent
- 3 D Had not considered the different options for surgical repair at all

**A2** \_\_\_\_\_  
Would you say that you:

- 1 D Definitely preferred Open Surgical Repair
- 2 D Preferred Open Surgical Repair to some extent
- 3 D Were equally happy with either treatment
- 4 D Definitely preferred Endovascular Aneurysm Repair (EVAR)
- 5 D Preferred EVAR to some extent
- 6 D Did not know / were unsure which treatment option you preferred

**A3** Have you talked to your primary care physician about the surgical treatment options available to you if you need an operation?

- 1 D Yes, I have talked to my doctor as much as I need to
- 2 D Yes, I have talked to my doctor but I have some unanswered questions
- 3 D No, I have not talked to my doctor at all
- 4 D Don't know

**A4** \_\_\_\_\_  
Who or what was your **main** source of information about the Open Surgical Repair operation?

- 1 D I did not have any information about the Open Surgical Repair operation
- 2 D Primary Care Physician
- 3 D A nurse
- 4 D A brochure or booklet
- 5 D Internet/website
- 6 D My family/friends
- 7 D Media (e.g. TV, newspapers)
- 8 D Patients' organization(s)
- 9 D Other source (please write in box below)

Please mark your answer clearly  
**INSIDE one box for each question**

eg check  one box only

**A5** \_\_\_\_\_

Who or what was your **main** source of information about the endovascular aneurysm repair (EVAR) operation?

- 1 D I did not get any information about the EVAR operation
- 2 D My primary care physician
- 3 D A nurse
- 4 D Brochure or booklet
- 5 D Internet/website
- 6 D My family/friends
- 7 D Media (e.g. TV, newspapers)
- 10 D Patients' organization(s)
- 11 D Other source (please write in

box below)

**A6** \_\_\_\_\_

Have you ever been given written information about the two different surgical treatments?

- 1 D Yes, I was given written information about both treatment options
- 2 D I was only given written information about open surgical repair
- 3 D I was only given written information about endovascular aneurysm repair
- 4 D No, I was not given any written information
- 5 D I don't know if I was given any written information

**A7** \_\_\_\_\_

Had your view of the different surgical treatment options been **influenced** by any of the following people?

Check  **all that apply**

- 1 D My primary care physician
- 2 D A surgeon
- 3 D A radiologist
- 4 D A nurse
- 5 D My family or friends
- 6 D Someone else
- 7 D My view was not influenced by anyone
- 8 D Don't know / unsure

## B Your current preference

There are two choices for repair:

-  the standard treatment is “**Open Surgical Repair**” and
-  the newer treatment is called “**EndoVascular Aneurysm Repair**” (EVAR).

Patients who are suitable for both treatments may be asked to decide between these two options.

Please mark your answer clearly  
**INSIDE one box for each question**

eg check  ~~one~~ box only

**B2** If your surgeon asked you today which treatment method you prefer **AT THIS MOMENT**, would you say that you:

- 1 D Definitely prefer Open Surgical Repair
- 2 D Prefer Open Surgical Repair to some extent
- 3 D Are equally happy with either treatment at present
- 4 D Definitely prefer Endovascular Aneurysm Repair (EVAR)
- 5 D Prefer EVAR to some extent
- 6 D Don't know / unsure



Please mark your answer clearly  
**INSIDE one box for each question**

eg check  one box only

**B3** Thinking about your answer to the previous question, what would you say is the **MAIN** factor influencing your preference?

- 1 D Invasiveness of surgery
- 2 D Size of scar
- 3 D Type of anesthetic
- 4 D Length of hospital stay
- 5 D Recovery time at home
- 6 D Risk of post-operative complications
- 7 D Risk of infection
- 8 D My medical history or existing condition
- 9 D Likelihood of survival
- 10 D I would take the doctor's advice
- 11 D Don't know / unsure
- 12 D Other (please write in box below)

**B4** Thinking about your answer at B2, how informed would you say you are about **OPEN SURGICAL REPAIR?**

- 1 D I definitely have all the information I need
- 2 D I have most of the information I need, but have some unanswered questions
- 3 D I have many unanswered questions
- 4 D I do not have any of the information I need
- 5 D Don't know / unsure

**B5** Thinking about your answer at B2, how informed would you say you are about **ENDOVASCULAR ANEURYSM REPAIR (EVAR)?**

- 1 D I definitely have all the information I need
- 2 D I have most of the information I need, but have some unanswered questions
- 3 D I have many unanswered questions
- 4 D I do not have any of the information I need
- 5 D Don't know / unsure

## C The things that are important to you

These questions will help us understand the sort of things that are important to you in considering the treatment option you prefer.

Please mark your answer clearly **INSIDE one box for each question**

eg check  **one** box only

**C1** We found that patients often made a trade off between:

a) EVAR being less invasive (with an associated lower risk of death during or immediately after the operation)....

as opposed to....

b) Open Surgical Repair having a lower risk of post operative complications requiring further intervention.

We would like to explore your view of these factors.

Would you say that you....

- 1 **D Definitely prefer less invasive surgery** (even with a possible increased risk of post operative complications)
- 2 **D Prefer less invasive surgery to some extent** (even with a possible increased risk of post operative complications)
- 3 **D Have no preference**
- 4 **D Definitely prefer a lower risk of post operative complications** (even with the need for more invasive surgery)
- 5 **D Prefer a lower risk of post operative complications to some extent** (even with the need for more invasive surgery)
- 6 **D Don't know / are unsure**

**C2** One difference between Open Surgical Repair and EVAR is the scar size. How important to you is the size of the scar?

- 1 **D Extremely important**
- 2 **D Somewhat important**
- 3 **D Neither important nor unimportant**
- 4 **D Not very important**
- 5 **D Not important at all**
- 6 **D Don't know / unsure**

Please mark your answer clearly  
INSIDE one box for each question

eg check  one box only

**C3** Another difference between Open Surgical Repair and EVAR is the average length of the hospital stay. How important to you is it to have a shorter hospital stay?

- 1 D Extremely important
- 2 D Somewhat important
- 3 D Neither important nor unimportant
- 4 D Not very important
- 5 D Not important at all
- 6 D Don't know / unsure

**C4** Another difference between Open Surgical Repair and EVAR is the need for post operative care in an intensive care unit. How important to you is it to AVOID a stay in intensive care?

- 1 D Extremely important
- 2 D Somewhat important
- 3 D Neither important nor unimportant
- 4 D Not very important
- 5 D Not important at all
- 6 D Don't know / unsure

**C5** Another difference between Open Surgical Repair and EVAR is the average length of time before you recover to resume normal day to day activities. How important to you is it to have a shorter recovery time?

- 1 D Extremely important
- 2 D Somewhat important
- 3 D Neither important nor unimportant
- 4 D Not very important
- 5 D Not important at all
- 6 D Don't know / unsure

**C6** There is a known risk of impotency with Open Surgical Repair, but the risk of impotency with EVAR is as yet unknown. How important to you is the risk of impotency?

- 1 D Extremely important
- 2 D Somewhat important
- 3 D Neither important nor unimportant
- 4 D Not very important
- 5 D Not important at all
- 6 D Don't know / unsure

**C7** Another difference is that EVAR can be carried out under local anesthesia but Open Surgical Repair requires general anesthesia. Would you say that you.....

- 1 D Would definitely prefer general anesthesia
- 2 D Would prefer general anesthesia to some extent
- 3 D Have no preference
- 4 D Would definitely prefer local anesthesia
- 5 D Would prefer local anesthesia to some extent
- 6 D Don't know / unsure

**C8** Please use the space below to tell us anything else which influences your views of the two main treatment options

---

## D Making a decision

These next questions explore whether or not the decision aid helped you in making a decision.

**Please mark your answer clearly INSIDE one box for each question**  
eg

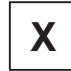

**D7** Some people like to be fully involved in decisions about their health, others prefer to leave decisions in the hands of the doctor. In terms of the decision about which of the two main surgical treatments for AAA you prefer, would you say that you.....

- 1 D Would definitely prefer to be actively involved in the decision
- 2 D Would like to be involved to some extent, but would prefer to leave the final decision in the hands of the surgeon
- 3 D Would prefer to leave the decision wholly in the hands of the surgeon
- 4 D Don't know or are unsure how involved you would like to be in the decision

## E About you

By answering these questions you will help us understand a bit more about the sort of things that influence views of the different treatment options.

### F1 What was your year of birth?

(Please write in)

|   |   |   |   |
|---|---|---|---|
| 1 | 9 | 3 | 4 |
|---|---|---|---|

e.g.

|   |   |   |   |
|---|---|---|---|
| 1 | 9 | Y | Y |
|---|---|---|---|

Please mark your answer clearly  
**INSIDE one box for each question**

eg: check  **one** box only

### F2 What is the highest level of education you completed

- D did not finish high school
- D High school
- D College or higher

### F3 Which of these **best** describes your current situation?

- D Working
- D Unemployed
- D Retired
- D Unable to work because of disability or ill health
- D In full time education / training
- D Other (Please tell us about this in box)

|  |
|--|
|  |
|--|

Please mark your answer clearly  
**INSIDE one box for each question**

eg: check  **X**  **one** box only

**F4** Do you have any long-standing illness, disability or condition?

- 1  Yes..... **Goto F5**
- 2  No..... **Goto F6**
- 3  Don't know / unsure  
... **Go to F6**

**F5** If you answered yes to the previous question, does this condition(s) cause you difficulty with any of the everyday activities that people your age can usually do?

- 1  Yes
- 2  No
- 3  Don't know / unsure

**F6** Overall, how would you rate your health during the past 4 weeks?

- 1  Excellent
- 2  Very good
- 3  Good
- 4  Fair
- 5  Poor
- 6  Very poor

**F7** Do you have any children aged under 18?

- 1  Yes
- 2  No

**F8** Do you provide care to a spouse, relative or friend to help them take care of themselves? (eg help with personal needs or household chores)

- 1  Yes
- 2  No

**F9** If you were to need care at home following an operation, is there someone who could provide this care:

- 1  Spouse/partner
- 2  Relative
- 3  Friend
- 4  Someone else
- 5  No one

**F10** To which of these racial groups would you say you belong? (Tick **ONE** only)

- 1 White/Caucasian
- 2 African American
- 3 Asian American
- 4 American Indian
- 5 Prefer not to answer
- 6 Other

(Please write in box)

**F11** To which of these ethnic groups would you say you belong? (Tick **ONE** only)

- 1 Hispanic
- 2 Non-Hispanic

## ANY OTHER COMMENTS

If you have any other comments you would like to make, please use the space below.

**Thank you**

**for taking part in this survey.**

## **SHARED DECISION MAKING ASSESSMENT**

### **DECISION PROCESS SCORE (Adapted for AAA Study)**

**PROCESS OF DECISION MAKING: OPEN OR EVAR** Michael Barry, MD, Floyd J. Fowler, PhD

Adapted by Barry et al from instruments validated in “Decision-making process reported by Medicare patients who had coronary artery stenting or surgery for prostate cancer.” Fowler et al, J. Gen Intern Med 2012. 27 (8): 911-6. The Site Study Coordinator, at the end of the enrollment visit, asks the Veteran the questions below.

---

As you probably know, there are two different ways to do surgery to repair an aneurysm: an open surgical repair and an endovascular aneurysm repair, also called an EVAR.

1. Did a doctor talk with you about having an open surgical repair of your aneurysm? (YES/NO)
  - a. (IF YES) Did a doctor talk about an open surgical repair as an approach you should seriously consider? (YES/NO)
2. How much did a doctor talk with you about the reasons you might want have an open surgical repair—a lot, some, a little or not at all?
3. How much did a doctor talk with you about the reasons you might not want an open surgical repair-- a lot, some, a little or not at all?
4. Did a doctor talk with you about having an Endovascular Aneurysm Repair (EVAR)?
  - a. (IF YES) Did a doctor talk about an EVAR procedure as an approach you should seriously consider? (YES/NO)
5. How much did a doctor talk with you about the reasons you might want have an EVAR-- a lot, some, a little or not at all?
6. How much did a doctor talk with you about the reasons you might not want an EVAR-- a lot, some, a little or not at all?
7. Has a doctor asked you if you would prefer to have an open repair or an EVAR? (YES/NO)
8. What type of repair did you want after reading the survey? (open surgical repair/EVAR)  
What type of repair did you want after talking with your doctor? (open surgical repair/EVAR)



## SURGEON SURVEY INSTRUMENT

### PRE-VISIT RECOMMENDATION

When I meet with this Veteran about his or her AAA, I will recommend:

| Open Repair,<br>Strongly | Open Repair,<br>Somewhat | No preference            | Endovascular<br>Repair, Somewhat | Endovascular<br>Repair, Strongly |
|--------------------------|--------------------------|--------------------------|----------------------------------|----------------------------------|
| <input type="checkbox"/> | <input type="checkbox"/> | <input type="checkbox"/> | <input type="checkbox"/>         | <input type="checkbox"/>         |

**How important were each of the following factors in the type of repair you recommended for this Veteran ?**

|                                                        | Not at all important     | Somewhat important       | Moderately important     | Very important           |
|--------------------------------------------------------|--------------------------|--------------------------|--------------------------|--------------------------|
| Anatomic considerations, such as neck length or access | <input type="checkbox"/> | <input type="checkbox"/> | <input type="checkbox"/> | <input type="checkbox"/> |
| Type of anesthesia required                            | <input type="checkbox"/> | <input type="checkbox"/> | <input type="checkbox"/> | <input type="checkbox"/> |
| Fewer procedural complications, including mortality    | <input type="checkbox"/> | <input type="checkbox"/> | <input type="checkbox"/> | <input type="checkbox"/> |
| Quicker recovery, faster return to work and activity   | <input type="checkbox"/> | <input type="checkbox"/> | <input type="checkbox"/> | <input type="checkbox"/> |
| Lower 5-year risk of requiring a reintervention        | <input type="checkbox"/> | <input type="checkbox"/> | <input type="checkbox"/> | <input type="checkbox"/> |
| Less intensive follow-up surveillance requirement      | <input type="checkbox"/> | <input type="checkbox"/> | <input type="checkbox"/> | <input type="checkbox"/> |

### Planned procedure

If I were to repair this Veteran's AAA tomorrow, I would perform the following type of repair:

| Open Repair              | Endovascular Repair      |
|--------------------------|--------------------------|
| <input type="checkbox"/> | <input type="checkbox"/> |

## SURGEON SURVEY INSTRUMENT

### POST-VISIT RECOMMENDATION

When I met with this Veteran about his or her AAA, I recommended:

| Open Repair,<br>Strongly | Open Repair,<br>Somewhat | No preference            | Endovascular Repair,<br>Somewhat | Endovascular Repair,<br>Strongly |
|--------------------------|--------------------------|--------------------------|----------------------------------|----------------------------------|
| <input type="checkbox"/> | <input type="checkbox"/> | <input type="checkbox"/> | <input type="checkbox"/>         | <input type="checkbox"/>         |

### Veteran's preference

This Veteran stated a preference for:

| Open Repair,<br>Strongly | Open Repair,<br>Somewhat | No preference            | Endovascular Repair,<br>Somewhat | Endovascular Repair,<br>Strongly |
|--------------------------|--------------------------|--------------------------|----------------------------------|----------------------------------|
| <input type="checkbox"/> | <input type="checkbox"/> | <input type="checkbox"/> | <input type="checkbox"/>         | <input type="checkbox"/>         |

Check here if you are uncertain of the Veteran's preference

### How important were each of the following factors in the *type of repair you recommended for this Veteran* ?

| Not at All important | Somewhat important | Moderately important | Very important |
|----------------------|--------------------|----------------------|----------------|
|----------------------|--------------------|----------------------|----------------|

This Veteran's preference

|                          |                          |                          |                          |
|--------------------------|--------------------------|--------------------------|--------------------------|
| <input type="checkbox"/> | <input type="checkbox"/> | <input type="checkbox"/> | <input type="checkbox"/> |
|--------------------------|--------------------------|--------------------------|--------------------------|

**Please rate the following factors only if your responses differ from the Pre-Visit Survey**

Anatomic considerations, such as neck length or access

|                          |                          |                          |                          |
|--------------------------|--------------------------|--------------------------|--------------------------|
| <input type="checkbox"/> | <input type="checkbox"/> | <input type="checkbox"/> | <input type="checkbox"/> |
|--------------------------|--------------------------|--------------------------|--------------------------|

Type of anesthesia required

|                          |                          |                          |                          |
|--------------------------|--------------------------|--------------------------|--------------------------|
| <input type="checkbox"/> | <input type="checkbox"/> | <input type="checkbox"/> | <input type="checkbox"/> |
|--------------------------|--------------------------|--------------------------|--------------------------|

Fewer procedural complications, including mortality

|                          |                          |                          |                          |
|--------------------------|--------------------------|--------------------------|--------------------------|
| <input type="checkbox"/> | <input type="checkbox"/> | <input type="checkbox"/> | <input type="checkbox"/> |
|--------------------------|--------------------------|--------------------------|--------------------------|

Quicker recovery, faster return to work and activity

|                          |                          |                          |                          |
|--------------------------|--------------------------|--------------------------|--------------------------|
| <input type="checkbox"/> | <input type="checkbox"/> | <input type="checkbox"/> | <input type="checkbox"/> |
|--------------------------|--------------------------|--------------------------|--------------------------|

Lower 5-year risk of requiring a reintervention

|                          |                          |                          |                          |
|--------------------------|--------------------------|--------------------------|--------------------------|
| <input type="checkbox"/> | <input type="checkbox"/> | <input type="checkbox"/> | <input type="checkbox"/> |
|--------------------------|--------------------------|--------------------------|--------------------------|

Less intensive follow-up surveillance requirement

|                          |                          |                          |                          |
|--------------------------|--------------------------|--------------------------|--------------------------|
| <input type="checkbox"/> | <input type="checkbox"/> | <input type="checkbox"/> | <input type="checkbox"/> |
|--------------------------|--------------------------|--------------------------|--------------------------|

### Planned procedure

If I were to repair this Veteran's AAA tomorrow, I would perform the following type of repair:

| Open Repair              | Endovascular Repair      | Not a candidate for repair |
|--------------------------|--------------------------|----------------------------|
| <input type="checkbox"/> | <input type="checkbox"/> | <input type="checkbox"/>   |

**SHORT-FORM PATIENT SATISFACTION QUESTIONNAIRE (PSQ-18)**

**These next questions are about how you feel about the medical care you receive.**

On the following pages are some things people say about medical care. Please read each one carefully, keeping in mind the medical care you are receiving now. (If you have not received care recently, think about what you would expect if you needed care today.) We are interested in your feelings, good and bad, about the medical care you have received.

How strongly do you AGREE or DISAGREE with each of the following statements?

(Circle One Number on Each Line)

|                                                                                                          | <u>Strongly</u><br><u>Agree</u> | <u>Agree</u> | <u>Uncertain</u> | <u>Disagree</u> | <u>Strongly</u><br><u>Disagree</u> |
|----------------------------------------------------------------------------------------------------------|---------------------------------|--------------|------------------|-----------------|------------------------------------|
| 1. Doctors are good about explaining the reason for medical tests .....                                  | 1                               | 2            | 3                | 4               | 5                                  |
| 2. I think my doctor's office has everything needed to provide complete medical care .....               | 1                               | 2            | 3                | 4               | 5                                  |
| 3. The medical care I have been receiving is just about perfect .....                                    | 1                               | 2            | 3                | 4               | 5                                  |
| 4. Sometimes doctors make me wonder if their diagnosis is correct .....                                  | 1                               | 2            | 3                | 4               | 5                                  |
| 5. I feel confident that I can get the medical care I need without being set back financially .....      | 1                               | 2            | 3                | 4               | 5                                  |
| 6. When I go for medical care, they are careful to check everything when treating and examining me ..... | 1                               | 2            | 3                | 4               | 5                                  |
| 7. I have to pay for more of my medical care than I can afford .....                                     | 1                               | 2            | 3                | 4               | 5                                  |
| 8. I have easy access to the medical specialists I need .....                                            | 1                               | 2            | 3                | 4               | 5                                  |

How strongly do you AGREE or DISAGREE with each of the following statements?

(Circle One Number on Each Line)

|                                                                                         | <u>Strongly</u><br><u>Agree</u> | <u>Agree</u> | <u>Uncertain</u> | <u>Disagree</u> | <u>Strongly</u><br><u>Disagree</u> |
|-----------------------------------------------------------------------------------------|---------------------------------|--------------|------------------|-----------------|------------------------------------|
| 9. Where I get medical care, people have to wait too long for emergency treatment ..... | 1                               | 2            | 3                | 4               | 5                                  |
| 10. Doctors act too businesslike and impersonal toward me .....                         | 1                               | 2            | 3                | 4               | 5                                  |
| 11. My doctors treat me in a very friendly and courteous manner .....                   | 1                               | 2            | 3                | 4               | 5                                  |
| 12. Those who provide my medical care sometimes hurry too much when they treat me ..... | 1                               | 2            | 3                | 4               | 5                                  |
| 13. Doctors sometimes ignore what I tell them .....                                     | 1                               | 2            | 3                | 4               | 5                                  |
| 14. I have some doubts about the ability of the doctors who treat me .....              | 1                               | 2            | 3                | 4               | 5                                  |
| 15. Doctors usually spend plenty of time with me .....                                  | 1                               | 2            | 3                | 4               | 5                                  |
| 16. I find it hard to get an appointment for medical care right away .....              | 1                               | 2            | 3                | 4               | 5                                  |
| 17. I am dissatisfied with some things about the medical care I receive .....           | 1                               | 2            | 3                | 4               | 5                                  |
| 18. I am able to get medical care whenever I need it .....                              | 1                               | 2            | 3                | 4               | 5                                  |

# Survey Administration Guide

## Intervention Sites

# Survey Administration Guide

## Control Group

1. Patient deemed eligible for both open repair and EVAR by Site Principal Investigator
2. Consent by Study Site Coordinator
3. Repair Preferences Survey (naive version), Surgeon Survey (Pre)
4. Physician Visit
5. Surgeon Survey (Post), Decision Process Score at end of visit.
6. PSQ-18 at 30 days post repair.

## Intervention Group

1. Patient deemed eligible for both open repair and EVAR by Site Principal Investigator
2. Consent by Study Site Coordinator
3. Pre-Survey, Decision Aid, Repair Preferences Survey (Decision Aid Version), Surgeon Survey (Pre)
4. Physician Visit
5. Surgeon Survey (Post), Decision Process Score at end of visit.
6. PSQ-18 at 30 days post repair.

---

## Your current preference

There are two choices for repair:

- the standard treatment is “**Open Surgical Repair**” and
- the newer treatment is called “**EndoVascular Aneurysm Repair**” (EVAR).

Patients who are suitable for both treatments may be asked to decide between these two options.

Please mark your answer clearly  
**INSIDE one box for each question**

eg check  **X** **one** box only

If your surgeon asked you today which treatment method you prefer **AT THIS MOMENT**, would you say that you:

- Definitely prefer Open Surgical Repair
- Prefer Open Surgical Repair to some extent
- Are equally happy with either treatment at present
- Definitely prefer Endovascular Aneurysm Repair (EVAR)
- Prefer EVAR to some extent
- Don't know / unsure

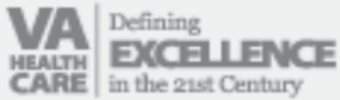

# A Veteran's Guide to Abdominal Aortic Aneurysm

This information pack contains medical words and terms that you may not know. A list of these words and their meanings is shown at the end of the booklet.

These words are in **bold** and underlined in the text.



## Introduction

This information booklet is written for patients like you, who have an **abdominal aortic aneurysm**.

We want to help you understand what it means to have an **abdominal aortic aneurysm**. We will discuss who needs treatment for their aneurysm. We will also discuss the types of treatment available and the risks and benefits of each one. We hope this booklet will help you be actively involved in planning your future care.

Remember, this is a general information booklet and your care and treatment will be shaped to meet your specific needs.

If you still have any questions after reading this booklet, you should contact either your primary care doctor or your vascular surgeon.

This booklet was developed and tested by the Vascular Surgery Research Group (VSRG) of Imperial College London and was modified for Veterans by the Veterans Affairs Outcomes Group in White River Junction, Vermont.

## What is an abdominal aortic aneurysm?

An aneurysm is a weak point in an artery (blood vessel). This weakness can cause the artery to stretch out like a balloon. This ballooning is called an aneurysm.

Aneurysms happen most often in the aorta.

The aorta is the main blood vessel in your body. It carries blood from the heart down through the chest and branches out to all of the body's major organs. A normal aorta is about  $\frac{3}{4}$ -1 inch in diameter.

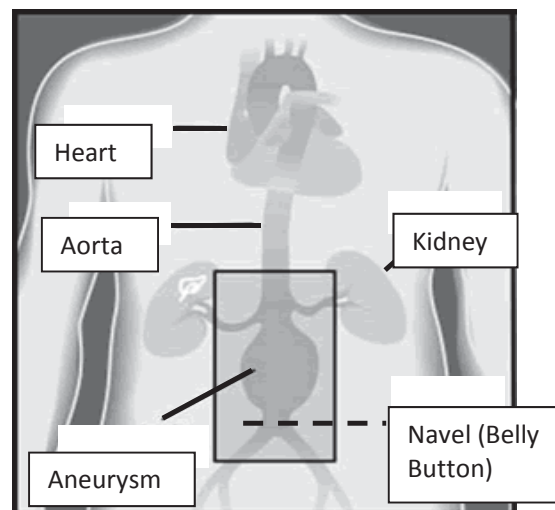

**Figure 1: Diagram showing where the aorta is in the body, and an example of an abdominal aortic aneurysm.**

Most people won't know they have an aortic aneurysm. Aneurysms usually don't have any symptoms. Some patients—about 1 in 4—will have pain or tenderness in their stomach, chest or back. They may also have reduced blood flow to their legs. When an abdominal aortic aneurysm gets bigger, the artery wall can leak or even burst. This risk increases when the diameter is over  $2 \frac{1}{4}$  inches. This leak or burst is called a "rupture" and leads to dangerous bleeding inside the body.

A rupture is very dangerous. It causes severe pain in the stomach or back area, a rapid heartbeat, a pulsing sensation in the stomach and skin feeling "cold and sweaty," Only 2 in 10 people survive an aortic aneurysm rupture and just half of all patients manage to get to a hospital at all.

**Luckily, many cases of ruptured aneurysm can be prevented by early diagnosis, careful monitoring and—when needed—planned treatment.**

## What causes an abdominal aortic aneurysm?

Aortic aneurysm can occur when the wall of the **aorta** is damaged or weakened. This damage can be caused by:

- Smoking
- High blood pressure
- Fatty deposits in the artery (**Atherosclerosis**)
- Inherited aortic wall weakness / family history
- Age

Rarely, Infection and injury can cause the **artery** to expand and form an aneurysm.

## Who gets an abdominal aortic aneurysm?

About every 1 in 20 men over the age of 65 will get an aneurysm. Men are four to five times more likely than women to get one. Aneurysms can run in families.

## How is abdominal aortic aneurysm diagnosed?

Aneurysms are often found when you have an x-ray, CT-scan, or ultrasound for another reason.

## Will I need treatment?

Not necessarily. Your surgeon may recommend repair if your aneurysm grows too big or too quickly.

Many smaller aneurysms never need treatment. Instead, they are measured with regular ultrasound or CT scans. They will need to be measured every 3-6 months or every year, depending on the size. When the aneurysm is over 2 inches (5centimeters) in diameter, you will meet with a Vascular Surgeon.

During this meeting, you will probably discuss “elective” (planned) aneurysm repair. He or she will take into account your specific needs and your medical history when planning your repair.

## Living with an aneurysm

You probably can't make your aneurysm go away. However, you can do things to keep it from getting bigger quickly. For example, if you smoke, quit. Quitting smoking can slow the growth of the aneurysm. You should also keep healthy with exercise, a low-fat diet checking your blood pressure regularly. Your doctor may also recommend a "statin" medication (to lower cholesterol levels) and a mini-aspirin (to thin the blood).

In general, you can keep up your usual activities or hobbies e.g. gardening, DIY, swimming or other sports, unless your doctor tells you to stop. These activities don't have any effect on the chances of your aneurysm rupturing.

Before surgery is considered, most patients will have a CT scan of the aneurysm. Your surgeon will use this to determine whether your aneurysm should be repaired with one technique, or whether you could have either.

**Figure 2: Two photographs showing CT scans of a normal abdominal aorta and an abdominal aortic aneurysm**

### 1. Normal abdominal aorta

This aorta is normal.

It measures just under an inch.

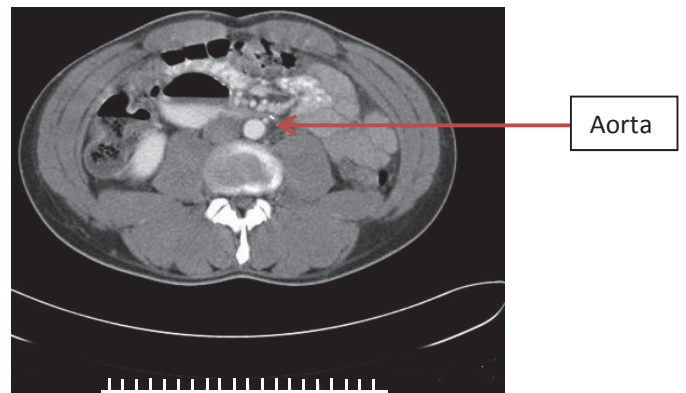

### 2. Abdominal aorta aneurysm

This is an aneurysm.

It measures 3 inches.

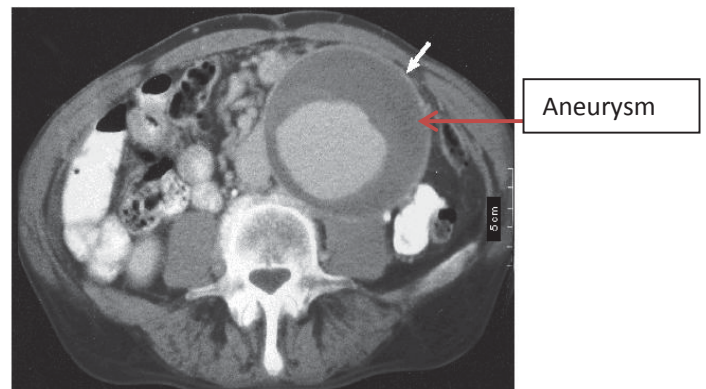

## What are the treatment options?

### Option 1: Open surgical repair

Open surgical repair of an abdominal aortic aneurysm is a major operation done by **Vascular Surgeons**.

The surgeon first makes a large cut lengthways to open the abdomen to expose the **aorta**. Next, the surgeon opens the aneurysm and takes out any blood clot or debris. The surgeon then sews the **graft** to the aorta—replacing the aneurysm. The graft lies inside what used to be the aneurysm. The surgeon sews the aneurysm over graft to protect it. (see Figure 3 below). The surgery usually takes 2 – 3 hours.

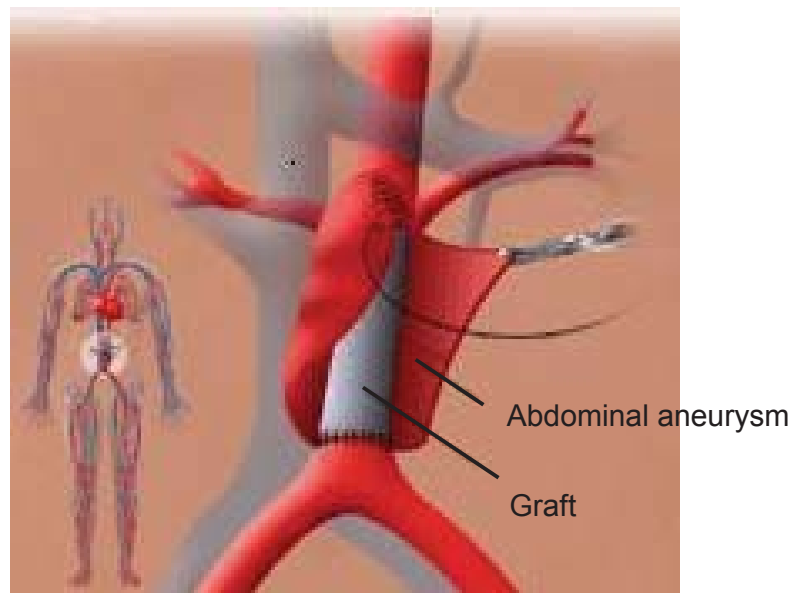

**Figure 3: Diagram showing the Open Surgical method for aortic aneurysm repair**

***Hospital stay, recovery time and follow-up:*** Most patients will spend the first day or two after an open repair in an Intensive Care Unit (ICU). Their hospital stay will be 4-8 days. Full recovery can take up to 2-3 months. Long term complications after a successful repair are rare. The grafts last 20- 30 years, so patients will not need to see their surgeon regularly after they've recovered from the operation.

## Option 2: Endovascular stent-graft repair (EVAR) of an abdominal aortic aneurysm

EVAR is a less invasive alternative to open aneurysm repair done by Vascular Surgeons.

The surgeon first makes small cuts over each artery in the groin. The surgeon uses these cuts to thread catheters into the aneurysm. Using an x-ray, the surgeon places the stent-graft at the top and bottom of the aneurysm. The surgeon then expands the stent graft and seals off the aneurysm. The graft strengthens the weakened **aorta** wall and prevents the aneurysm from rupturing (see Figure 4, page 15).

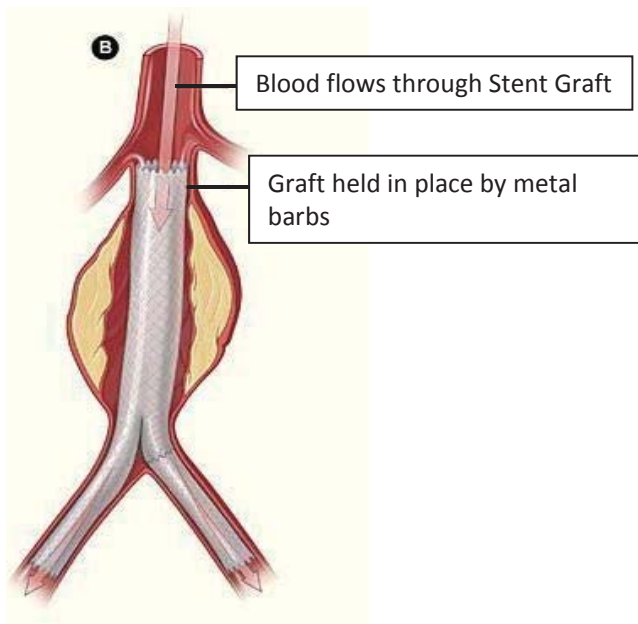

There may be a need for additional **endovascular** or surgical procedures before, during or after the main procedure in order to complete the EVAR deployment successfully. These may include **stents** in the **iliac** arteries, “blocking off” of selected arteries or bypass grafting. **Endovascular repair** usually takes 2 to 3 hours to complete.

**Hospital stay, recovery time and follow-up:** Most patients will stay in the hospital for 2-4 days after their EVAR. Patients can return to normal activity within 4 to 6 weeks. We do not know the long term results of endovascular repair, so patients need to have yearly CT scans and follow-up visits to monitor the old aneurysm and the endovascular stent-graft.

## Comparison table of the options for aortic aneurysm repair

The following table highlights the differences between the two main methods for abdominal aortic aneurysm repair.

|                                                          | <i>Open Surgical Aneurysm Repair</i>    | <i>Endovascular Aneurysm Repair</i> |
|----------------------------------------------------------|-----------------------------------------|-------------------------------------|
| <b>Scar</b>                                              | Single, large cut lengthways to abdomen | Two small cuts, one in each groin   |
| <b>Anesthesia</b>                                        | General                                 | General or Local                    |
| <b>Intensive Care Unit (ICU) stay</b>                    | 1-2 days                                | Unlikely / None                     |
| <b>Total Hospital Stay</b>                               | 6-8 days                                | 2-3 days                            |
| <b>Complete Recovery</b>                                 | 2-3 months                              | 4-6 weeks                           |
| <b>Risk of death (one month)</b>                         | 4-8 in 100                              | Approx. 2 in 100                    |
| <b>Risk of Complications within 4 years of repair*</b>   | 6 in 100                                | 41 in 100                           |
| <b>Risk of Re-intervention within 4 years of repair*</b> | 6 in 100                                | 21 in 100                           |
| <b>Risk of impotence</b>                                 | Approx. 1 in 10                         | 2 in 100                            |
| <b>Long term follow-up with CAT scan needed</b>          | No                                      | Yes                                 |

## 5. Which is the best treatment option?

There is **no “best treatment”** when considering the two techniques currently available for aneurysm repair. National and international clinical studies have shown that each method has its own associated benefits and disadvantages. Patients must fully understand what each method involves and the long term uncertainties and implications associated with undergoing EVAR.

## 6. What happens next?

The next steps will be specific to you and your aneurysm. Together, you and your surgeon will discuss the options available to you and reach a decision as to the best treatment for your aneurysm.



## 7. Key references

The UK Small Aneurysm Trial Participants. Mortality results for randomised controlled trial of early elective surgery or ultrasonographic surveillance of small abdominal aortic aneurysms. *Lancet* 1998; 352: 1649-55.

Lederle FA, Wilson SE, Johnson GR, et al. Immediate repair compared with surveillance of small abdominal aortic aneurysms. *N Engl J Med* 2002; 346: 1437-44.

Irvine CD, Shaw E, Poskitt KR, Whyman MR, Earnshaw JJ, Heather BP. A comparison of the mortality rate after elective repair of aortic aneurysms detected either by screening or incidentally. *Eur J Vasc Endovasc Surg* 2000; 20: 374-8.

Dubost C, Allary M, Oeconomos N. Treatment of aortic aneurysms; removal of the aneurysm; re-establishment of continuity by grafts of preserved human aorta. *Mem Acad Chir (Paris)* 1951; 77: 381-83.

Parodi JC, Palmaz JC, Barone HD. Transfemoral intraluminal graft implantation for abdominal aortic aneurysm. *Ann Vasc Surg* 1991; 5: 491-99.

Blankensteijn JD, de Jong S, Prinssen M, van der Ham A. Two year outcomes after conventional or endovascular repair of abdominal aortic aneurysms. *New England Journal of Medicine* 2005; 352: 2398-2405.

The EVAR trial participants. Comparison of endovascular aneurysm repair with open repair in patients with abdominal aortic aneurysm (EVAR trial 1), 30-day operative mortality results: randomised controlled trial. *Lancet* 2004; 364(9437): 843-8

The EVAR trial participants. Endovascular aneurysm repair versus open repair in patients with abdominal aortic aneurysm (EVAR Trial 1): randomised controlled trial. *Lancet* 2005; 365(9478): 2179-86.

O'Connor AM, Stacey D, Entwistle V, Llewellyn-Thomas H, Rovner D, Holmes-Rovner M, Tait V, Tetroe J, Fiset V, Barry M, Jones J. Decision aids for people facing health treatment or screening decisions. *Cochrane database of Systematic reviews* 2003; Issue 1.

## 8. List of contributors and reviewers

|                                                                   |                                            |
|-------------------------------------------------------------------|--------------------------------------------|
| Dr Justine Reise<br>Research Fellow                               | VSRG, Imperial College London              |
| Miss Helen Sheldon<br>Senior Research Associate                   | Picker Institute Europe, Oxford            |
| Miss Danielle Swain<br>Quality Improvement Manager                | Picker Institute Europe, Oxford            |
| Mr Don Redding<br>Head of Communications                          | Picker Institute Europe, Oxford            |
| Sister Angela Williams<br>Vascular Nurse Specialist               | VSRG, Imperial College London              |
| Miss Louise Brown<br>Trial Manager and Statistician               | VSRG, Imperial College London              |
| Professor Janet Powell<br>Professor of Vascular Biology           | VSRG, Imperial College London              |
| Professor Roger Greenhalgh<br>Emeritus Professor of Surgery       | VSRG, Imperial College London              |
| Professor David Bergqvist<br>Professor of Vascular Surgery        | University Hospital Uppsala, Sweden        |
| Mr Ian J Franklin<br>Consultant Vascular Surgeon                  | Charing Cross Hospital, London             |
| Karina Newhall<br>VA Outcomes Group Fellow                        | White River Junction VAMC, White River, VT |
| Philip Goodney<br>VA Outcomes Group Co-Director, Vascular Surgeon | White River Junction VAMC, White River, VT |

## 9. Glossary of terms and abbreviations

|                                                   |                                                                                                                                                                        |
|---------------------------------------------------|------------------------------------------------------------------------------------------------------------------------------------------------------------------------|
| <b><i>Abdominal aortic aneurysm</i></b>           | Balloon-like stretching of the part of the aorta in the stomach area                                                                                                   |
| <b><i>Angiography/ Angiogram</i></b>              | A special X-ray which uses contrast (dye) injected into the bloodstream to see blood flow in the vessels. The picture obtained is called an angiogram.                 |
| <b><i>Aorta</i></b>                               | This is the largest artery in the human body and carries oxygenated blood from the heart to the rest of the body                                                       |
| <b><i>Artery</i></b>                              | Blood vessel that carries oxygen-rich blood                                                                                                                            |
| <b><i>Atherosclerosis</i></b>                     | Hardening, “furring up” and narrowing of the arteries which restricts normal blood flow                                                                                |
| <b><i>Catheter</i></b>                            | A tube that can be inserted into a blood vessel to allow access by a surgical instrument e.g. a graft sheath                                                           |
| <b><i>Contrast (dye)</i></b>                      | The contrast that contains iodine which is used in CT and angiography to see blood vessels and watch blood flow in the body                                            |
| <b><i>Computed Tomography Scan (CT Scan)</i></b>  | A special X-ray machine that provides very detailed images of internal organs                                                                                          |
| <b><i>Diameter (maximum)</i></b>                  | The width of the aneurysm from one side to the other, at its largest point                                                                                             |
| <b><i>Endoleak</i></b>                            | A blood leak into the original abdominal aortic aneurysm after a stent-graft has been put in place                                                                     |
| <b><i>Endovascular</i></b>                        | Within the blood vessel                                                                                                                                                |
| <b><i>Endovascular aneurysm repair (EVAR)</i></b> | A method of aneurysm repair where an endovascular stent-graft is positioned within an aneurysm via the blood vessels and restores normal blood flow                    |
| <b><i>Endovascular stent-graft</i></b>            | A “man-made” fabric graft covering a supportive metal stent that has metal fixings at the top and bottom that can be used to attach the stent-graft to the vessel wall |
| <b><i>Femoral artery</i></b>                      | Blood vessel that carries blood to the thigh in each leg                                                                                                               |

|                                   |                                                                                                                                                                                                                |
|-----------------------------------|----------------------------------------------------------------------------------------------------------------------------------------------------------------------------------------------------------------|
| <b>Heparin</b>                    | A medicine that helps to prevent blood clotting                                                                                                                                                                |
| <b>Iliac artery</b>               | Blood vessel that connects the lower part of the aorta to the femoral artery in each leg                                                                                                                       |
| <b>Impotence</b>                  | Inability to develop or maintain an erection of the penis                                                                                                                                                      |
| <b>Interventional Radiologist</b> | A doctor who uses image guidance methods, such as X-ray, to gain access to vessels and organs. Interventional radiologists can treat certain conditions through the skin that might otherwise require surgery. |
| <b>Lumen</b>                      | The inner open space or cavity of a tube-like structure                                                                                                                                                        |
| <b>Open surgical repair</b>       | A method of aneurysm repair involving a large cut to the abdomen, and replacement of the aneurysmal aorta with an artificial graft which restores normal blood flow                                            |
| <b>Rupture</b>                    | Bursting of the artery wall leading to serious internal bleeding                                                                                                                                               |
| <b>Sheath</b>                     | A long plastic tube that contains the endovascular graft and is used to position the graft in place within the aneurysm                                                                                        |
| <b>Statins</b>                    | A group of drugs that lower cholesterol levels in the body                                                                                                                                                     |
| <b>Stents</b>                     | Metal parts of the endovascular graft that provide support and hold it in place                                                                                                                                |
| <b>Ultrasound</b>                 | Method of obtaining pictures of the inside of the body using sound waves                                                                                                                                       |
| <b>Vascular</b>                   | Relating to the vessels that carry blood                                                                                                                                                                       |

*Booklet compiled and edited by:*

*Dr Justine Reise PhD BSc (Hons) and Miss Helen Sheldon MA BA (Hons)*

*Version 1, July 2007*

*Review date: July 2008, Revised by P. Goodney and K. Newhall May 17<sup>th</sup>, 2015*

*Adapted from A Patient's Guide to Abdominal Aortic Aneurysm, 30/07/2007, Version 1  
©Imperial College London and Picker Institute Europe*

# Survey of Veteran Preference for Method of Abdominal Aortic Aneurysm Repair

## **What is the survey about?**

This is a survey to explore patient views about abdominal aortic aneurysm (AAA) and the current treatment options as described in the detailed patient decision aid. Information from the survey will improve our understanding of what is important to patients who have this condition and could result in greater patient involvement in future treatment and care.

## **Why should I complete the survey?**

The views of all patients are important. This is your chance to help to shape future care of AAA patients. Taking part in this survey is voluntary.

## **Who is carrying out the survey?**

The survey is being carried out by a research team at the Veterans Administration Hospital in White River Junction, Vermont.

## **How to complete the survey**

Please answer the questions as fully as possible following the instructions given. The questionnaire is short and will take about 15 minutes to complete.

## **Questions or help?**

If you have any questions, please ask the nurse coordinator who administered the survey.

**Your answers are confidential.**

---

## A Your initial preference

We are interested to know your views of the two main surgical treatment options BEFORE reading the decision aid.

Please mark your answer clearly **INSIDE one box for each question**

Ex: check  ~~one~~ box only

**A1** BEFORE you looked at the decision aid, would you say that you:

- 1 D Had definitely considered the different options for surgical repair
- 2 D Had considered the different options for surgical repair to some extent
- 3 D Had not considered the different options for surgical repair at all

**A2** BEFORE you looked at the decision aid, would you say that you:

- 1 D Definitely preferred Open Surgical Repair
- 2 D Preferred Open Surgical Repair to some extent
- 3 D Were equally happy with either treatment
- 4 D Definitely preferred Endovascular Aneurysm Repair (EVAR)
- 5 D Preferred EVAR to some extent
- 6 D Did not know / were unsure which treatment option you preferred

**A3** Have you talked to your primary care physician about the surgical treatment options available to you if you need an operation?

- 1 D Yes, I have talked to my doctor as much as I need to
- 2 D Yes, I have talked to my doctor but I have some unanswered questions
- 3 D No, I have not talked to my doctor at all
- 4 D Don't know

**A4** BEFORE you looked at the information pack, who or what was your **main** source of information about the Open Surgical Repair operation?

- 1 D I did not have any information about the Open Surgical Repair operation
- 2 D Primary Care Physician
- 3 D A nurse
- 4 D A brochure or booklet
- 5 D Internet/website
- 6 D My family/friends
- 7 D Media (e.g. TV, newspapers)
- 8 D Patients' organization(s)
- 9 D Other source (please write in box below)

Please mark your answer clearly  
**INSIDE one box for each question**

eg check  one box only

**A5** BEFORE you looked at the decision aid, who or what was your main source of information about the endovascular aneurysm repair (EVAR) operation?

- 1 D I did not get any information about the EVAR operation
- 2 D My primary care physician
- 3 D A nurse
- 4 D Brochure or booklet
- 5 D Internet/website
- 6 D My family/friends
- 7 D Media (e.g. TV, newspapers)
- 10 D Patients' organization(s)
- 11 D Other source (please write in

box below)

**A6** Apart from the decision aid we sent you with this questionnaire, have you ever been given written information about the two different surgical treatments?

- 1 D Yes, I was given written information about both treatment options
- 2 D I was only given written information about open surgical repair
- 3 D I was only given written information about endovascular aneurysm repair
- 4 D No, I was not given any written information
- 5 D I don't know if I was given any written information

**A7** BEFORE you looked at the decision aid, had your view of the different surgical treatment options been influenced by any of the following people?

Check  all that apply

- 1 D My primary care physician
- 2 D A surgeon
- 3 D A radiologist
- 4 D A nurse
- 5 D My family or friends
- 6 D Someone else
- 7 D My view was not influenced by anyone
- 8 D Don't know / unsure

## B Your current preference

You will see from the decision aid that there are two main methods of abdominal aortic aneurysm repair currently available:

- the standard treatment is “**Open Surgical Repair**” and
- the newer treatment is called “**EndoVascular Aneurysm Repair**” (EVAR).

Patients who are suitable for both treatments may be asked to decide between these two options.

Please mark your answer clearly  
**INSIDE one box for each question**

eg check  ~~one~~ box only

**B2** If your surgeon asked you today which treatment method you prefer **AT THIS MOMENT**, would you say that you:

- Definitely prefer Open Surgical Repair
- Prefer Open Surgical Repair to some extent
- Are equally happy with either treatment at present
- Definitely prefer Endovascular Aneurysm Repair (EVAR)
- Prefer EVAR to some extent
- Don't know / unsure



Please mark your answer clearly  
**INSIDE one box for each question**

eg check  one box only

**B3** Thinking about your answer to the previous question, what would you say is the **MAIN** factor influencing your preference?

- 1 D Invasiveness of surgery
- 2 D Size of scar
- 3 D Type of anesthetic
- 4 D Length of hospital stay
- 5 D Recovery time at home
- 6 D Risk of post-operative complications
- 7 D Risk of infection
- 8 D My medical history or existing condition
- 9 D Likelihood of survival
- 10 D I would take the doctor's advice
- 11 D Don't know / unsure
- 12 D Other (please write in box below)

**B4** Thinking about your answer at B2, how informed would you say you are about **OPEN SURGICAL REPAIR?**

- 1 D I definitely have all the information I need
- 2 D I have most of the information I need, but have some unanswered questions
- 3 D I have many unanswered questions
- 4 D I do not have any of the information I need
- 5 D Don't know / unsure

**B5** Thinking about your answer at B2, how informed would you say you are about **ENDOVASCULAR ANEURYSM REPAIR (EVAR)?**

- 1 D I definitely have all the information I need
- 2 D I have most of the information I need, but have some unanswered questions
- 3 D I have many unanswered questions
- 4 D I do not have any of the information I need
- 5 D Don't know / unsure

## C The things that are important to you

These questions will help us understand the sort of things that are important to you in considering the treatment option you prefer.

Please mark your answer clearly **INSIDE one box for each question**

eg check  one box only

**C1** We found that patients often made a trade off between:

a) EVAR being less invasive (with an associated lower risk of death during or immediately after the operation)....

as opposed to....

b) Open Surgical Repair having a lower risk of post operative complications requiring further intervention.

We would like to explore your view of these factors.

Would you say that you....

- 1 **D Definitely prefer less invasive surgery** (even with a possible increased risk of post operative complications)
- 2 **D Prefer less invasive surgery to some extent** (even with a possible increased risk of post operative complications)
- 3 **D Have no preference**
- 4 **D Definitely prefer a lower risk of post operative complications** (even with the need for more invasive surgery)
- 5 **D Prefer a lower risk of post operative complications to some extent** (even with the need for more invasive surgery)
- 6 **D Don't know / are unsure**

**C2** One difference between Open Surgical Repair and EVAR is the scar size. How important to you is the size of the scar?

- 1 **D Extremely important**
- 2 **D Somewhat important**
- 3 **D Neither important nor unimportant**
- 4 **D Not very important**
- 5 **D Not important at all**
- 6 **D Don't know / unsure**

Please mark your answer clearly  
INSIDE one box for each question

eg check  one box only

**C3** Another difference between Open Surgical Repair and EVAR is the average length of the hospital stay. How important to you is it to have a shorter hospital stay?

- 1 D Extremely important
- 2 D Somewhat important
- 3 D Neither important nor unimportant
- 4 D Not very important
- 5 D Not important at all
- 6 D Don't know / unsure

**C4** Another difference between Open Surgical Repair and EVAR is the need for post operative care in an intensive care unit. How important to you is it to AVOID a stay in intensive care?

- 1 D Extremely important
- 2 D Somewhat important
- 3 D Neither important nor unimportant
- 4 D Not very important
- 5 D Not important at all
- 6 D Don't know / unsure

**C5** Another difference between Open Surgical Repair and EVAR is the average length of time before you recover to resume normal day to day activities. How important to you is it to have a shorter recovery time?

- 1 D Extremely important
- 2 D Somewhat important
- 3 D Neither important nor unimportant
- 4 D Not very important
- 5 D Not important at all
- 6 D Don't know / unsure

**C6** There is a known risk of impotency with Open Surgical Repair, but the risk of impotency with EVAR is as yet unknown. How important to you is the risk of impotency?

- 1 D Extremely important
- 2 D Somewhat important
- 3 D Neither important nor unimportant
- 4 D Not very important
- 5 D Not important at all
- 6 D Don't know / unsure

**C7** Another difference is that EVAR can be carried out under local anesthesia but Open Surgical Repair requires general anesthesia. Would you say that you.....

- 1 D Would definitely prefer general anesthesia
- 2 D Would prefer general anesthesia to some extent
- 3 D Have no preference
- 4 D Would definitely prefer local anesthesia
- 5 D Would prefer local anesthesia to some extent
- 6 D Don't know / unsure

**C8** Please use the space below to tell us anything else which influences your views of the two main treatment options

---

## D Making a decision

These next questions explore whether or not the decision aid helped you in making a decision.

**Please mark your answer clearly INSIDE one box for each question**  
eg

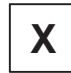

**D7** Some people like to be fully involved in decisions about their health, others prefer to leave decisions in the hands of the doctor. In terms of the decision about which of the two main surgical treatments for AAA you prefer, would you say that you.....

- 1 D Would definitely prefer to be actively involved in the decision
- 2 D Would like to be involved to some extent, but would prefer to leave the final decision in the hands of the surgeon
- 3 D Would prefer to leave the decision wholly in the hands of the surgeon
- 4 D Don't know or are unsure how involved you would like to be in the decision

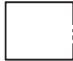

## E About you

By answering these questions you will help us understand a bit more about the sort of things that influence views of the different treatment options.

### F1 What was your year of birth?

(Please write in)

|   |   |   |   |
|---|---|---|---|
| 1 | 9 | 3 | 4 |
|---|---|---|---|

e.g.

|   |   |   |   |
|---|---|---|---|
| 1 | 9 | Y | Y |
|---|---|---|---|

Please mark your answer clearly  
**INSIDE one box for each question**

eg: check  **one** box only

### F2 What is the highest level of education you completed

- 1 D did not finish high school
- 2 D High school
- 3 D College or higher

### F3 Which of these **best** describes your current situation?

- 1 D Working
- 2 D Unemployed
- 3 D Retired
- 4 D Unable to work because of disability or ill health
- 5 D In full time education / training
- 6 D Other (Please tell us about this in box)

|  |    |
|--|----|
|  | 10 |
|--|----|

Please mark your answer clearly  
**INSIDE one box for each question**

eg: check  **X**  **one** box only

**F4** Do you have any long-standing illness, disability or condition?

- 1 **D** Yes..... **Goto F5**
- 2 **D** No..... **Goto F6**
- 3 **D** Don't know / unsure  
... **Go to F6**

**F5** If you answered yes to the previous question, does this condition(s) cause you difficulty with any of the everyday activities that people your age can usually do?

- 1 **D** Yes
- 2 **D** No
- 3 **D** Don't know / unsure

**F6** Overall, how would you rate your health during the past 4 weeks?

- 1 **D** Excellent
- 2 **D** Very good
- 3 **D** Good
- 4 **D** Fair
- 5 **D** Poor
- 6 **D** Very poor

**F7** Do you have any children aged under 16?

- 1 **D** Yes
- 2 **D** No

**F8** Do you provide care to a spouse, relative or friend to help them take care of themselves? (eg help with personal needs or household chores)

- 1 **D** Yes
- 2 **D** No

**F9** If you were to need care at home following an operation, is there someone who could provide this care:

- 1 **D** Spouse/partner
- 2 **D** Relative
- 3 **D** Friend
- 4 **D** Someone else
- 5 **D** No one

**F10** To which of these racial groups would you say you belong? (Tick **ONE** only)

- 1 White/Caucasian
- 2 African American
- 3 Asian American
- 4 American Indian
- 5 Prefer not to answer
- 6 Other

(Please write in box)

**F11** To which of these ethnic groups would you say you belong? (Tick **ONE** only)

- 1 Hispanic
- 2 Non-Hispanic

### **ANY OTHER COMMENTS**

If you have any other comments you would like to make, please use the space below.

**Thank you**  
**for taking part in this survey.**
